# Supplementary material
Source: ML conference proceedings conference paper supplement (https://proceedings.mlr.press/v32/tu14.html)
Supplement: Supplementary file 2 [file tu14-supp.zip]

Archive with 1 entries (1 files):
- lda-long.pdf
